1 **Title: Juvenile corals inherit mutations acquired during the parent's lifespan**

2 **Running Title: Juvenile corals inherit mutations acquired during the parent's**  
3 **lifespan**

4

5 **Authors:** Kate L. Vasquez Kuntz<sup>1^</sup>, Sheila A. Kitchen<sup>1,2^</sup>, Trinity L. Conn<sup>1</sup>, Samuel A. Vohsen<sup>1</sup>,  
6 Andrea N. Chan<sup>1</sup>, Mark J. A. Vermeij<sup>3,4</sup> Christopher Page<sup>5,6</sup>, Kristen L. Marhaver<sup>3</sup>, Iliana B.  
7 Baums<sup>1\*</sup>

8

9 1 Department of Biology, The Pennsylvania State University, University Park PA 16803;  
10 [klv9@psu.edu](mailto:klv9@psu.edu), [sak89@psu.edu](mailto:sak89@psu.edu), [tlc458@psu.edu](mailto:tlc458@psu.edu), [svohsen1@gmail.com](mailto:svohsen1@gmail.com),  
11 [andrea.n.chan13@gmail.com](mailto:andrea.n.chan13@gmail.com),

12 2 Division of Biology and Biological Engineering, California Institute of Technology, Pasadena,  
13 CA 91125; [sak3097@caltech.edu](mailto:sak3097@caltech.edu)

14 3 CARMABI Foundation, Piscaderabaai z/n, PO Box 2090, Willemstad, Curacao;  
15 [kristen@marhaverlab.com](mailto:kristen@marhaverlab.com); [m.vermeij@carmabi.org](mailto:m.vermeij@carmabi.org)

16 4 Department of Freshwater and Marine Ecology, Institute for Biodiversity and Ecosystem  
17 Dynamics, University of Amsterdam, 1090 GE, Amsterdam, The Netherlands.

18 5 Mote Marine Laboratory, 24244 Overseas Highway, Summerland Key, FL 33042;  
19 [cpage@mote.org](mailto:cpage@mote.org)

20 6 University of Hawai'i at Manoa, School of Ocean and Earth Science and Technology, 2540  
21 Dole Street, Holmes Hall 402, Honolulu, HI 96822; [Pagec@si.edu](mailto:Pagec@si.edu)

22 <sup>^</sup>These authors contributed equally to this work

23

24

25 ***\*Corresponding author: [baums@psu.edu](mailto:baums@psu.edu)***

26

27

## 28 **Abstract**

29 128 years ago, August Weismann proposed that the only source of inherited genetic variation in  
30 animals is the germline<sup>1</sup>. Julian Huxley reasoned that if this were true, it would falsify Jean-  
31 Baptiste Lamarck's theory that acquired characteristics are heritable<sup>2</sup>. Since then, scientists have  
32 discovered that not all animals segregate germline cells from somatic cells permanently and early  
33 in development<sup>3</sup>. In fact, throughout their lives, Cnidaria<sup>4-6</sup> and Porifera<sup>7</sup> maintain primordial  
34 stem cells that continuously give rise to both germline and somatic cells. The fate of mutations  
35 generated in this primordial stem cell line during adulthood remains an open question. It was  
36 unknown whether post-embryonic mutations could be heritable in animals<sup>8-10</sup>—until now. Here  
37 we use two independent genetic marker analyses to show that post-embryonic mutations are  
38 inherited in the coral *Acropora palmata* (Cnidaria, Anthozoa). This discovery upends the long-  
39 held supposition that post-embryonic genetic mutations acquired over an animal's lifetime in  
40 non-germline tissues are not heritable<sup>2</sup>. Over the centuries-long lifespan of a coral, the  
41 inheritance of post-embryonic mutations may not only change allele frequencies in the local  
42 larval pool but may also spread novel alleles across great distances via larval dispersal. Thus,  
43 corals may have the potential to adapt to changing environments via heritable somatic  
44 mutations<sup>10</sup>. This mechanism challenges our understanding of animal adaptation and prompts a  
45 deeper examination of both the process of germline determination in Cnidaria and the role of  
46 post-embryonic genetic mutations in adaptation and epigenetics of modular animals.  
47 Understanding the role of post-embryonic mutations in animal adaptation will be crucial as  
48 ecological change accelerates in the Anthropocene.

49

## 50 **Main**

51 With the exception of planarian flatworms<sup>11</sup>, bilaterian animals segregate germline cells from  
52 somatic cells early in development<sup>3</sup> (Fig. 1a). Because most animals segregate germlines early in  
53 development, it has long been assumed that only germline mutations are inherited in animals.  
54 Thus, genetic mutations that occur after early development (*i.e.*, post-embryonic mutations in the  
55 somatic tissues) cannot be inherited in these animals—limiting their evolutionary impact. In  
56 contrast, plants segregate germline cells late in development<sup>12-14</sup> and pre-germline mutations are  
57 heritable. According to the genetic mosaicism hypothesis<sup>15-17</sup>, such post-embryonic mutations  
58 provide genetic diversity for adaptation to local conditions<sup>16</sup>. At the base of the metazoan tree,

59 sessile cnidarians share life history characteristics with plants, including modular growth<sup>18</sup>, long  
60 lifespans<sup>19</sup>, high capacity for regeneration<sup>20</sup>, continuous germline determination<sup>3</sup>, and alternating  
61 asexual/sexual reproductive cycles<sup>21,22</sup>. One group of cnidarians, scleractinian corals, exemplify  
62 many of these characteristics. Scleractinian coral species often reproduce by asexual cloning and  
63 fragmentation and some species have remarkably long lifespans, estimated to be upwards of  
64 thousands of years<sup>19</sup>, allowing genets to reproduce for centuries or even millennia. However,  
65 projected environmental changes could lower the fitness of these previously well-adapted genets.  
66 Scleractinian corals and other sessile colonial animals may instead acquire mutations during  
67 adulthood<sup>3</sup> and subsequently pass these mutations onto their offspring (Fig. 1); some of these  
68 mutations may be beneficial and contribute to adaptation. However, continuous germline  
69 determination has not been confirmed in scleractinians, thus it is not known if non-germline  
70 mutations are inherited—although this possibility has been debated vigorously<sup>23-25</sup>. Scleractinians  
71 are foundational species in tropical reefs and are ecologically and economically important  
72 species. Due to recent global declines, the persistence of corals in the face of climate change is  
73 uncertain. Thus, understanding whether non-germline mutations are inherited in scleractinians  
74 and how this contributes to their adaptive potential is relevant to predict their response to further  
75 climate change. Here we show that the endangered Caribbean coral *Acropora palmata* passes  
76 post-embryonic genetic mutations to its offspring, overturning the commonly-accepted view that  
77 acquired genetic variation is not heritable in animals<sup>1</sup>.

78

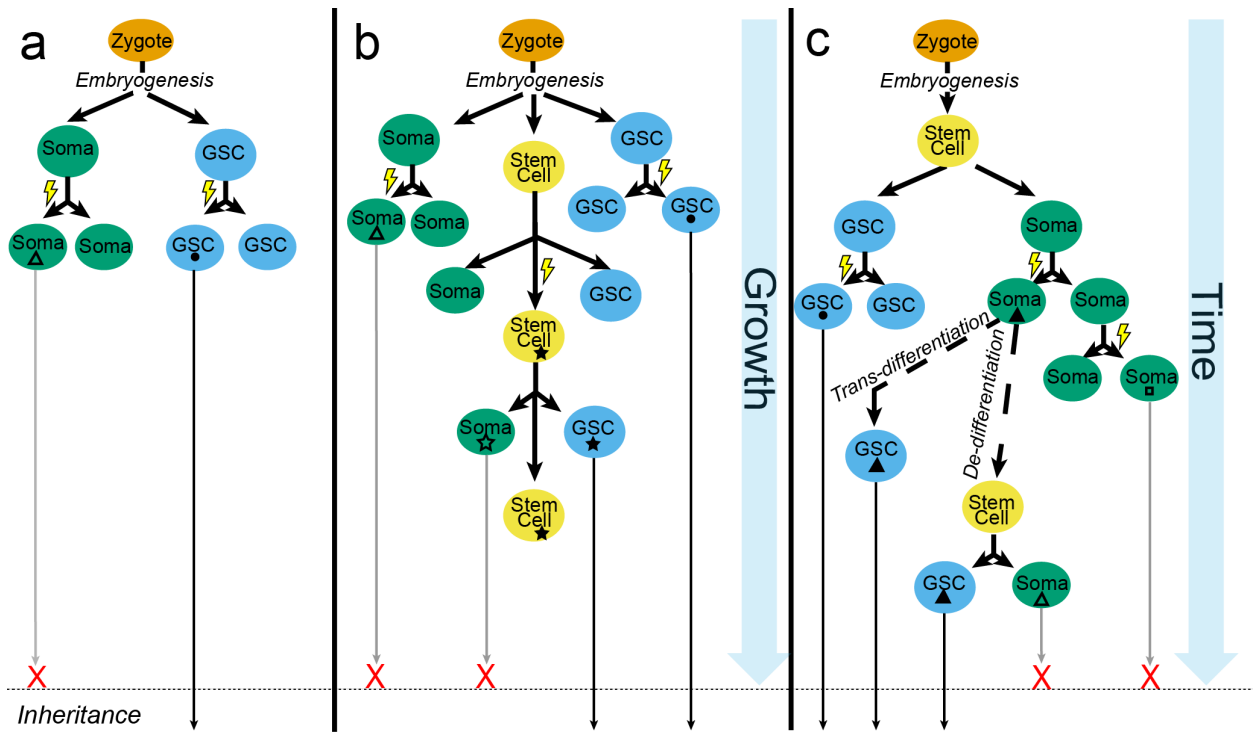

79

80 **Figure 1. Overview of post embryonic mutations (PEMs) in animals.**

81 (a) Most bilaterian animals segregate germline cells from somatic cells early in development,  
 82 thus preventing somatic PEMs from being inherited by offspring. (b) Planarian flatworms,  
 83 sponges, and potentially some cnidarians continuously segregate a germline and somatic tissue  
 84 from a population of stem cells as they grow, allowing for an accumulation of germline mutations  
 85 that are heritable. (c) Occasionally, somatic cells may trans or de-differentiate into germline  
 86 cells thus passing on PEMs that are somatic in origin. For all panels, colored ovals represent  
 87 cell types and shapes within an oval (triangles, dots, squares) represent PEMs. Solid-fill shapes  
 88 represent mutations that are inherited; outlined shapes represent mutations that are not  
 89 inherited. GSC = Germline stem cell; Soma = somatic tissue. Lightning bolts are mutation  
 90 causing events.

91

92 A single, sexually produced *Acropora palmata* polyp can grow into a large genet with many  
 93 member colonies (ramets) via the asexual processes of polyp budding and colony fragmentation.

94 We previously showed that *A. palmata* genets frequently harbor post-embryonic mutations that  
 95 are restricted to only a subset of ramets<sup>19</sup>. During *A. palmata* spawning in 2017, we crossed  
 96 gametes of two *A. palmata* genets from Florida, both with known post-embryonic mutations<sup>19</sup>  
 97 (Fig. 2a). Larval genotypes were analyzed at five microsatellite loci<sup>19,26</sup> (Fig. 2a; Table S1).

98 While most of the larvae analyzed ( $n=38$ , 61.3) were produced with genetic contributions from  
 99 both parents, 38.7% ( $n=24$ ) contained genetic contributions from only one parent, a surprising  
 100 result because *A. palmata* has been characterized as a self-incompatible hermaphrodite<sup>26,27</sup>.

101 During spawning, *A. palmata* colonies release gametes in buoyant bundles of eggs and sperm

102 that break up at the sea-surface, and fertilization of eggs typically requires non-self sperm<sup>28</sup>.  
 103 However, emerging evidence for deviations in coral sexual reproduction, such as  
 104 parthenogenesis or self-fertilization (selfing), has been noted<sup>26,29-32</sup>. The exact mechanisms that  
 105 lead to uniparental offspring are unknown, but this could result from the breakdown of the self-  
 106 incompatibility system and/or meiotic pathways that are independent of fertilization (Fig. 2b).  
 107 Among the uniparental larvae, a subset ( $n=6$ , 25%) inherited one known post-embryonic  
 108 mutation from their parents (Table S1). At a subset of loci, most uniparental larvae ( $n= 22$ ,  
 109 35.5%; Table S1) inherited two different alleles from one parent, indicating that the larvae were  
 110 diploid. However, we designated two uniparental larvae as haploid ( $n=2$ , 3.2%) because they  
 111 were homozygous at all loci. However, homozygous diploids and hemizygous haploids cannot  
 112 be confidently distinguished from microsatellite chromatograms alone.

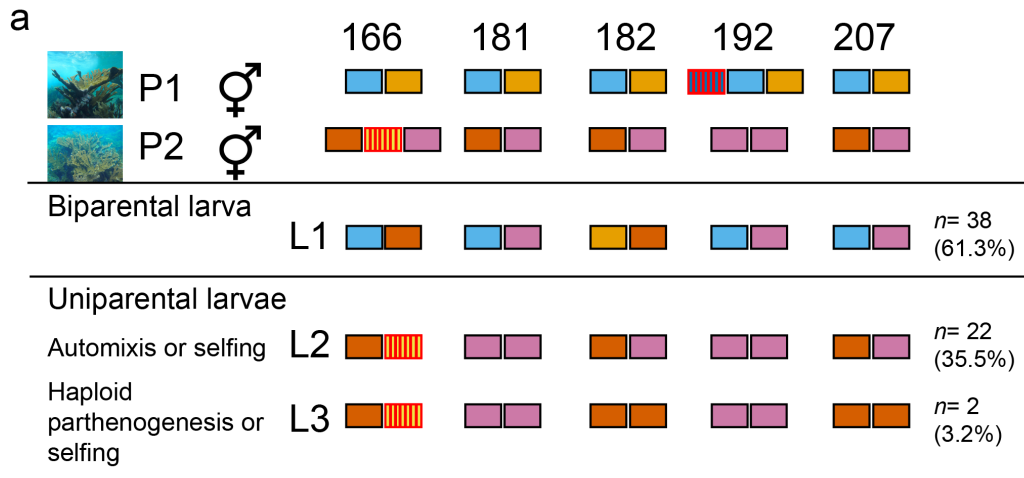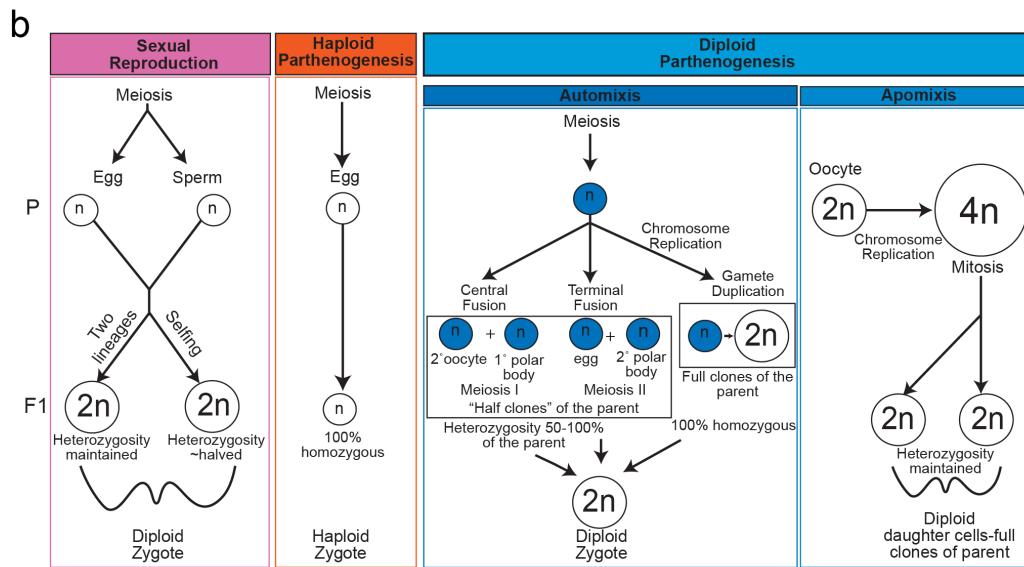

114 **Figure 2. Inheritance of post-embryonic mutations.** (a) Three distinct patterns of allelic  
115 inheritance were observed across five *Acropora*-specific microsatellite loci. Examples of these  
116 three patterns (L1, L2, L3) are depicted here for a subset of the samples analyzed. Gametes  
117 were collected from two hermaphroditic *Acropora palmata* colonies (P1 and P2) that each had  
118 known somatic mutations (ancestral alleles are indicated by solid colored blocks, mutated  
119 alleles are indicated by blocks with vertical lines) in one of the five loci assayed (166, 181, 182,  
120 192, 207). While diploid in the ancestral state (represented as two blocks per locus), *A. palmata*  
121 ramets may gain alleles over time via gene duplication (represented as three blocks per  
122 locus<sup>19</sup>). P1 and P2 were crossed to produce coral larvae. Allelic patterns in most larvae (L1)  
123 followed Mendelian expectations: larvae inherited one allele from each parent at each locus  
124 (biparental larvae, 61.3%). However, allelic patterns in the remaining larvae (L2 and L3)  
125 indicated that they were uniparental in origin. L2- and L3-type larvae inherited alleles from only  
126 one parent (P2), including the somatic mutation at locus 166. L3 larvae could either be the result  
127 of haploid parthenogenesis or selfing because microsatellite analysis cannot distinguish  
128 between homo- and hemizygous states. (b) Summary of sexual reproductive strategies evident  
129 in this study and the genetic consequences of each on ploidy (n) and heterozygosity.

130  
131 The following year, we observed high rates of cell division in *A. palmata* eggs collected from a  
132 single colony in Curacao, despite thorough removal of parent-colony sperm and before addition  
133 of donor sperm (Fig. 3a). Because *A. palmata* is thought to be self-incompatible, this indicated  
134 possible parthenogenesis, selfing, or sibling-chimerism at the colony level (Fig. 2b). Hundreds of  
135 these eggs developed into larvae that settled normally, took up symbionts, and matured into  
136 multi-polyp juveniles. After four months, they were preserved for single nucleotide  
137 polymorphism (SNP) analysis. For genotyping, we collected tissue samples of the parent colony  
138 ( $n=10$ ) and one sample from each of the five nearest neighbor colonies, which could have been  
139 potential donors of contaminating sperm (Fig. 3a). DNA was extracted from thirty recruits and  
140 from all parent and surrounding colony samples ( $n=15$ ) and submitted for SNP analysis  
141 ([coralsnp.science.psu.edu/galaxy/](http://coralsnp.science.psu.edu/galaxy/)<sup>33</sup>). Genotypes were assigned for 19,694 SNP probes. A multi-  
142 locus genotype analysis revealed that the five nearest neighbor colonies were ramets of the same  
143 genet as the parent colony (Table S2), with an average pairwise genetic distance of  $0.0041 \pm$   
144  $0.0003$  within a colony, and  $0.0056 \pm 0.0030$  between colonies (Table S3; range from 0.0013 to  
145  $0.0133$ ;<sup>33</sup>). All genet samples were therefore considered to be possible sources of the post-  
146 embryonic mutations found in the juveniles. The average pairwise genetic distance between  
147 genet samples and the juveniles was  $0.0361 \pm 0.0064$  and among juveniles was  $0.0508 \pm 0.0082$   
148 (Table S3), similar to previous estimates for siblings<sup>33</sup>.

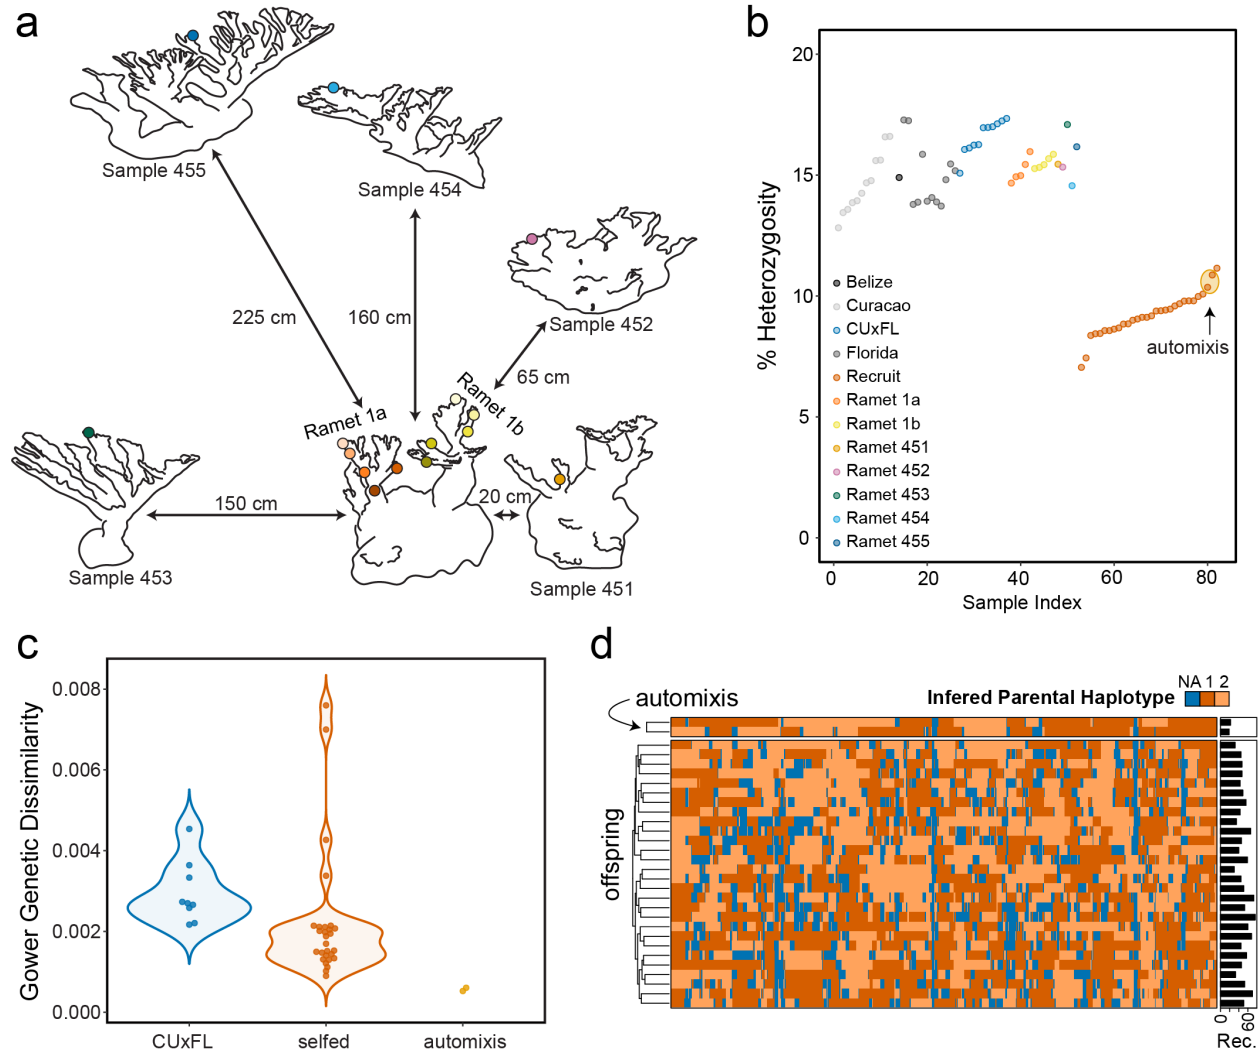

149

150 **Figure 3 Novel sexual reproductive modes observed in *A. palmata*.** (a) Sampling map of  
 151 parent colony and surrounding ramets. Ramets are arranged as they were sampled on the reef  
 152 and numbers next to arrows indicate the physical distance between them. Colored dots indicate  
 153 the location of tissue samples analyzed via the SNP genotyping array. (b) Percent heterozygous  
 154 loci (n=19,694 loci) for parent, ramets, offspring, and other Caribbean samples from Curacao,  
 155 Belize, Florida and larvae resulting from a cross between Curacao and Florida colonies (CU x  
 156 FL<sup>34</sup>). (c) Gower genetic dissimilarity of shared homozygous loci for all possible parental-  
 157 offspring combinations of the CU x FL cross as well as selfed and automictic larvae from parent  
 158 colony 441-1a. (d) Inferred haplotype blocks inherited by sibling offspring from the parent using  
 159 scaffold resolution of the *A. digitifera* reference genome, revealing the number of recombination  
 160 events per offspring. Phased parental haplotypes are from sister chromatids 1 (red) or 2  
 161 (orange), or could not be determined (NA, blue).  
 162

163 To evaluate whether juveniles were bi- or uniparental in origin, their heterozygosity was  
 164 compared to adult *A. palmata* sampled from across the Caribbean, which have heterozygosity  
 165 values ranging from 12.5-17.1% (Fig. 3b and Table S2,<sup>33</sup>). Curacao parent samples were within



166 this range whereas heterozygosity in the juveniles was lower, from 7.05-11.5%. This strongly  
167 suggests that juveniles were uniparental in origin (Fig. 2b). Given that the eggs from all nights  
168 were exposed to self-sperm within the egg/sperm bundles released by the parent colony, we  
169 calculated pairwise Gower dissimilarity (GD) of shared homozygous loci for all possible  
170 parental-offspring combinations to determine if eggs were fertilized by their own sperm (selfed)  
171 or the result of parthenogenesis. GD ranges from 0 to 1, where values of 0 indicate perfect  
172 genetic identity at all loci which is expected for ‘true’ parent-offspring triads<sup>35</sup>. However, in  
173 practice, GD values for parent-offspring triads tend to be greater than zero due to technical errors  
174 in genotyping. We identified two recruits with mean GD of  $0.0006 \pm 0.0006$  to putative parental  
175 donors, which is approximately a fifth of the mean GD of biparental recruits from an  
176 experimental cross between Curacao and Florida *A. palmata* gametes<sup>34</sup> (Fig. 3c). These two  
177 juveniles were also assigned to the same multi-locus genet as the parent samples (Table S2),  
178 indicative of parthenogenetic origins. However, they were not full clones of the parent. The  
179 genetic distance of the two offspring that share a genet ID with the parent ramets is nearly four  
180 times that of the genetic distance between parent ramets, but a little less than half the genetic  
181 distance of the other offspring (Table S3). This may indicate that they are “half-clones” of  
182 automictic origin via central or terminal fusion after meiosis (Fig. 2b). The remaining 28 recruits  
183 had an average GD of  $0.0022 \pm 0.0016$  similar to the biparental outcross.

184 We were able to assign putative parentage of the juveniles to the parental ramets (Table S4). The  
185 most common combination of parents was parents 453 and 441-1a ( $n=14$  triads) followed by  
186 parents 453 and 446-1b ( $n=4$  triads). The presence of several full-siblings from the same parental  
187 genet made it possible to phase the scaffolds of each sibling to further examine their reproductive  
188 mode of origin. Despite only having scaffold resolution of the *A. digitifera* reference genome, we  
189 were able to infer haplotype blocks of the siblings inherited from the parent, thereby revealing  
190 recombination events (Fig. 3d). The two parthenogenetic recruits had the lowest number of  
191 inferred recombination events ( $n=19$  and  $22$ ; Fig. 3d), suggesting at least one round of meiosis  
192 occurred. The selfed recruits had on average  $50.67 \pm 12.20$  inferred recombination events (Table  
193 S5). Although one selfed recruit had higher heterozygosity than the automictic recruits (Fig. 3b),  
194 this was not necessarily indicative that it belongs in the same category. For example, it has been  
195 shown with mathematical models that automictic individuals can share anywhere from around  
196 50% to 100% of the heterozygous loci with the parent<sup>36</sup>. In addition, the automictic recruits went



197 through less than half the average number of recombination events than the selfed recruits,  
198 consistent with both the oocyte and spermatogonium chromosomes undergoing recombination  
199 before selfing as opposed to only the oocyte chromosomes recombining before fusion of meiotic  
200 products. Combined with their low heterozygosity, these GD values and inferred recombination  
201 events suggest that there are two recruits of automictic origins and 28 recruits that are the  
202 product of selfing (Fig. 3b-e).

203 For genotyping probes without missing data in the parent genet ( $n=16,748$ ), allele calls were  
204 tallied for all tissue samples from the parent genet ( $n=15$ ) and these were compared to allele calls  
205 in the juveniles (Table S6). Because ancestral alleles should be the most common genotype  
206 among the 15 parent samples, minority SNP calls (present in 7 samples or fewer) were classified  
207 as post-embryonic mutations ( $n=271$ ). Alternatively, minority SNP calls could also be due to  
208 technical error. We previously estimated the technical error rate of our SNP array to be 0.52%  
209 (Table S7<sup>33</sup>) and the number of detected mutations ( $n=271$ ) was three times higher than the  
210 expected number of technical errors ( $n=104$ ). The number of inherited mutations in juveniles  
211 ( $n=139$ ) also exceeded the error rate and we further validated SNP calls via RFLP (see below).  
212 Most mutations (72.3%) were due to transitions and fewer (27.7%) were due to transversions  
213 (Table S8). Putative mutations were found in both protein-coding (13.28%) and non-protein-  
214 coding regions (86.72%, Table S9). Parent 453 had the most mutations ( $n=149$ , Table S2)  
215 followed by parent 448 ( $n=52$ ), a part of ramet 1b from the parent colony (Fig. 3a). Out of these  
216 mutations, 139 were detected in at least one juvenile and the number of mutations per juvenile  
217 ranged from 11 to 50 (Fig. 4a, Table S2 and S6). Loci with putative inherited post-embryonic  
218 mutations most often changed from a homozygous state to a heterozygous state (gain of  
219 heterozygosity (GOH),  $n=91$ ), followed by loci that went from a heterozygous state to a  
220 homozygous state (loss of heterozygosity (LOH),  $n=45$ , Table S8). While all but one LOH  
221 mutation was shared between a parent and offspring, less than half the GOH mutations were  
222 shared. Elevated GOH identified in the parental samples could be due to sample quality, which  
223 has been shown to inflate heterozygosity calls with genotyping array data<sup>33</sup>.

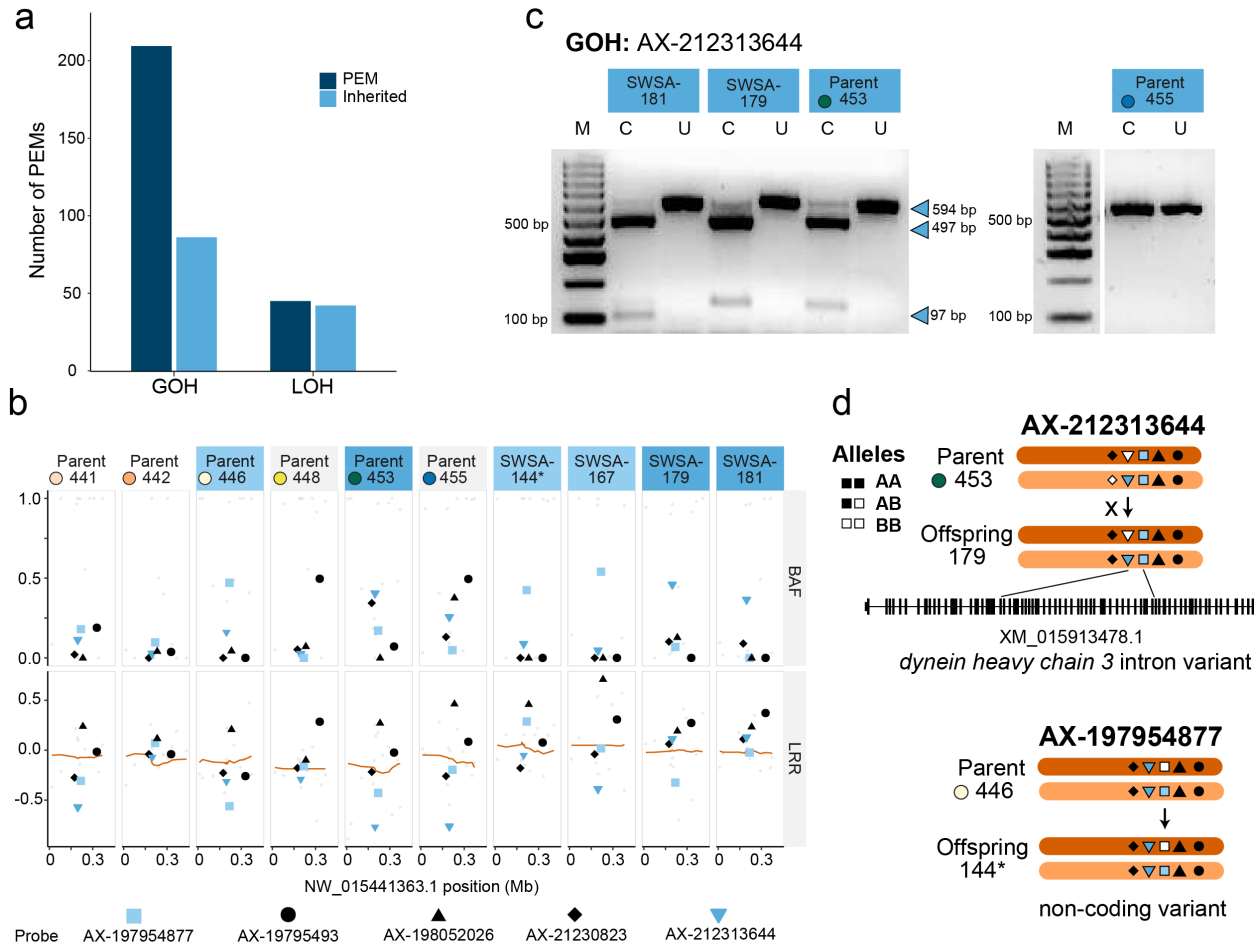

224

225 **Figure 4 Characterization of inherited post-embryonic mutations (PEMs) detected in the**  
 226 **SNP data.** (a) Gain of heterozygosity (GOH) mutations outnumbered loss of heterozygosity  
 227 (LOH) mutations. Proportionally, more LOH than GOH mutations were inherited. (b) Maps of  
 228 two metrics of allele signal intensity, the BAF (total allelic intensities) and LRR (relative allelic  
 229 intensities) that are commonly used to investigate somatic mutation and copy number variation;  
 230 orange line represents sliding average of 20 SNPs along the scaffold (position in megabases  
 231 Mb, x-axis). (c) RFLP validation of inherited GOH mutation, AX-212313644. For each sample,  
 232 the uncut (U) and cut (C) PCR products are shown. Each gel contains a size standard (lane M,  
 233 bp = base pairs). The two recruits (SWSA-179 and SWSA-181) share the heterozygous  
 234 mutation with the parent 453, resulting in 3 bands, while the parent 455 predicted to have the  
 235 non-mutant homozygous state for this site did not cut, resulting in 1 band (d) RFLP-validated  
 236 post-embryonic mutation, AX-212313644 is found within the intron of the *dynein heavy chain*.  
 237 GOH mutation, AX-197954877 is found on the same scaffold as AX-212313644. Symbols  
 238 represent the five mutations detected along this scaffold in at least one sample. Black shapes:  
 239 not inherited, blue shapes: inherited, filled shapes: A allele, and open shapes: B allele. Arrows  
 240 denote inheritance and crosses do not. One automictic offspring is denoted by an asterisk.  
 241

242 Mapping two metrics of allele signal intensity, the b-allele frequency (total allelic intensities) and  
 243 log R ratio (relative allelic intensities) that are commonly used to investigate somatic mutation

244 and copy number variation, confirmed that most mutations in the diploid juveniles were not a  
245 product of copy number differences (Fig. 4b).

246 To validate the detected SNP mutations, SNP-RFLP markers were designed for 19 of the  
247 inherited loci<sup>33</sup> (Table S10). SNP-containing regions were amplified by PCR, and the resulting  
248 PCR product was digested by a restriction enzyme (Fig. 4c). Markers that produced both sharp  
249 PCR bands and clear results in restriction digests were further investigated. Of these markers,  
250 GOH variant mutation locus AX-212313644 produced the clearest banding patterns on gels. Two  
251 larvae (SWSA-179, SWSA-181) share the heterozygous mutation with the parent 453, resulting  
252 in 3 bands (Fig. 4c) while parent 455 predicted to have the non-mutant homozygous state for this  
253 site did not cut, resulting in 1 band (4c). The RFLP marker confirms the inheritance of the GOH  
254 mutation found at this locus discovered in the SNP array data. Post-embryonic mutation locus  
255 AX-212313644 is a non-coding variant found within the intron of the *dynein heavy chain 3*,  
256 upstream of another intron mutation in the same parent sample but not shared with the other  
257 juveniles screened in this study (Fig. 4d).

258

259 By investigating coral juveniles from parents with known post-embryonic mutations, we provide  
260 evidence for the inheritance of post-embryonic mutations (possibly somatic in origin) in animals.  
261 Because coral genets can persist for hundreds to thousands of years, post-embryonic mutations  
262 can rise to high frequency in parts of a genet as a result of selection and/or stochastic processes<sup>37</sup>.  
263 These mutations could then be dispersed over shorter distances by fragmentation, and over  
264 longer distances by pelagic larvae that have inherited the mutations.

265 The origin of post-embryonic mutations in the adult *A. palmata* remains unknown. Mutations  
266 identified here as being passed from an adult colony to meiotically-produced offspring (Fig. 2  
267 and 4) may have originated in stem cells, which were passed on to the germline during  
268 differentiation (Fig. 1b). The mutations may have also originated in the soma, de-differentiated  
269 into stem cells, and then re-differentiated into germ cells. Alternatively, if scleractinian corals  
270 develop like most bilaterian animals (Fig. 1a) and segregate a germline early in development,  
271 most of these mutations may have originated in the somatic tissue and transdifferentiated from  
272 soma to germ cells (Fig. 1c). In either case, the adult mutations must have occurred post-  
273 embryogenesis, because they were not shared among all ramets of the parent genet. Buss<sup>13</sup>

274 posited that somatic post-embryonic mutations, if heritable, might be beneficial to a modular  
275 organism. Immediately after a somatic cell mutates, it undergoes somatic environmental  
276 selection and its propagation depends on successfully outcompeting other somatic lineages for  
277 positions in the germline<sup>38</sup>. Beneficial (or neutral) mutations that survive post-embryonic  
278 environmental selection may thus be disproportionately represented in the cells of a genet<sup>39</sup>, an  
279 advantage that ancestral germ line mutations do not have. Studies of *Acropora cervicornis*  
280 growth show that new polyp tissue (including gonads) appears to be differentiating from  
281 epidermal or somatic tissue. Ten of the uniparental offspring carried the same mutation (SNP  
282 AX-212312351) as a single parent sample (453), indicating that it may have been somatic in  
283 origin.

284 Curiously, the coral juveniles analyzed here had a substantially higher percentage of uniparental  
285 larvae (msat: 38.71%, SNP: 100%) than those in previous studies (ca. 1-2%;<sup>26,27</sup>). In the  
286 Caribbean, failure of sexual recruitment is prevalent among most important reef-building  
287 species<sup>23,24</sup>, therefore asexual processes (fragmentation and reattachment) have dominated local  
288 population growth on many reefs<sup>40</sup>. The majority of large, long-lived Caribbean reef-building  
289 coral species are self-incompatible hermaphrodites which require the presence of gametes from  
290 another genet for successful fertilization<sup>27,41</sup>. Thus, the physical distance between genets and/or  
291 asynchronous spawning of neighboring genets may be insurmountable obstacles for sperm to  
292 successfully fertilize spawned eggs<sup>25,42</sup>. Further, in the absence of dense populations of potential  
293 mates (and their water-dispersed reproductive pheromones), corals may prioritize the generation  
294 of uniparental larvae, as outcrossing and selfing may result in the recombination of beneficial  
295 post-embryonic mutations into different genetic backgrounds. An alternative to this coral choice  
296 hypothesis is the coral senescence hypothesis. Aging genets may lose the ability to recognize and  
297 reject self-gametes due to mutations in *e.g.*, gamete recognition or self-incompatibility systems.  
298 A third explanation for the high instance of uniparental larvae observed in this study is the  
299 environmental driver hypothesis: toxins such as endocrine disruptors are now present in reef  
300 environments<sup>43</sup> and may change sexual reproductive behavior. As coral populations decline,  
301 uniparental reproduction may increase in frequency, potentially resulting in decreased genetic  
302 diversity. At the same time, there is the intriguing possibility that post-embryonic mutations  
303 might help buffer such losses of genetic diversity.

304 The inheritance of acquired genetic variation fundamentally changes how we understand animal  
305 adaptation. By acquiring mutations throughout their decades- to millennia-long lifespans and  
306 passing these mutations on to their meiotic offspring, corals may be able to confer and disperse  
307 favorable phenotypes. Perhaps the inheritance of acquired mutations that are beneficial and their  
308 subsequent dispersal via the mobile life stage and/or the incorporation of uniparental sexual  
309 strategies in the absence of reproductively active (or any) mates helps to explain why corals have  
310 been able to persist for over 500 million years<sup>44</sup>. In some *Drosophila*<sup>45</sup> and vertebrate<sup>46</sup> species  
311 that are facultatively parthenogenetic, there are no clear subpopulations between individuals who  
312 reproduce automictically and sexually unless rare automixis facilitates the colonization of a  
313 sparse or unpopulated area<sup>36</sup>. We can only speculate on what this reproductive flexibility  
314 afforded coral populations over geologic time because reconstructing past evolutionary events is  
315 difficult. Elucidating the effect of post-embryonic mutations on gene expression and epigenetic  
316 patterning will be critical for modeling the ecological impacts of simultaneous use of different  
317 sexual strategies. Modeling the evolutionary genetic consequences of post-embryonic mutations  
318 may also help to explain their roles in mutational meltdown under Muller's ratchet<sup>47</sup> or in  
319 adaptation in the next century. Moving forward, the question remains how, where, and under  
320 what circumstances post-embryonic mutations will positively or negatively affect coral  
321 populations today.

322

## 323 **Methods**

324 **2017 mutant gamete collection and crosses.** We targeted *A. palmata* colonies with post-  
325 embryonic mutations at their microsatellite loci for gamete collection. Gamete bundles were  
326 collected on August 11<sup>th</sup>, 2017 from two reefs in the Florida Keys: Sand Island Reef (SIR, Lat.  
327 25.0179; Long. -80.368617) and Elbow Reef (ELR, Lat. 25.15185; Long. 80.2497). At SIR,  
328 gametes from two colonies were collected: Sand Island Blue Mutant and Sand Island Orange. At  
329 ELR, gametes were collected from the colony named Elbow Green Mutant. The first cross was  
330 between Sand Island Blue Mutant and Sand Island Orange (hereafter referred to as cross 1MP  
331 (One Mutant Parent)). The second cross was between Sand Island Blue Mutant and Elbow Green  
332 Mutant (hereafter referred to as cross 2MP (Two Mutant Parents)). For cross 1MP, we combined  
333 1 ml of eggs and 1 ml of sperm (concentration  $\sim 10^6$ ) from each parent at 23:15 and waited 1.5  
334 hours to allow fertilization to take place. Following fertilization, embryos were washed two

335 times with filtered seawater (FSW) and placed in a 1 L container with FSW to grow overnight.  
336 For each parent, eggs and sperm from the same colony were also combined in selfing controls.  
337 After 1.5 hours, it was noted that Sand Island Blue Mutant and Sand Island Orange did not  
338 undergo any self-fertilization because no dividing embryos were observed. For cross 2MP, 1 ml  
339 of eggs and 1 ml of sperm from each mutant colony were combined at 00:38 and allowed 1 hour  
340 to fertilize. At approximately 01:38, embryos were washed two times with FSW and placed in a  
341 1 L container with FSW to develop overnight. We performed selfing crosses for 2MP as well and  
342 noted that Sand Island Blue mutant eggs and sperm did not self while Elbow Green Mutant eggs  
343 and sperm did self, with a self-fertilization rate ranging from 0.0034 to 0.070% over two nights.  
344 The following morning, we removed any eggs that had not fertilized and performed a water  
345 change. We continued to do maintenance water changes on the crosses twice a day for three  
346 days. Generally, larvae began swimming at the end of the third day. Finally, at 96 hour post-  
347 fertilization, individual swimming larvae from each cross (1MP  $n=300$ ; 2MP  $n=200$ ) were  
348 preserved individually in 96% non-denatured ethanol and stored at  $-20^{\circ}\text{C}$  until shipment to the  
349 Pennsylvania State University.

350

351 **Larval DNA extraction and microsatellite analysis.** DNA was extracted from ninety-five  
352 larvae from each cross. The larvae were rinsed once with fresh ethanol to remove debris and  
353 ethanol was then replaced with 20  $\mu\text{l}$  of 5% Chelex solution and 2  $\mu\text{l}$  of 20 mg/ml Proteinase K.  
354 Samples were vortexed for 2 seconds, digested overnight at  $55^{\circ}\text{C}$ , and heated to  $95^{\circ}\text{C}$  before  
355 cooling to  $4^{\circ}\text{C}$ .

356 The first multiplex PCR amplified microsatellites 166, 192, and 181<sup>26</sup>. Microsatellite markers  
357 were amplified by PCR in a 10  $\mu\text{l}$  reaction volume containing water, 10X Original Buffer, 25  
358 mM MgCl, 10 mM dNTP, 5  $\mu\text{M}$  166-pet, 5  $\mu\text{M}$  192-6fam, 5  $\mu\text{M}$  181-ned, 5 U/ $\mu\text{l}$  GoTaq Flexi  
359 DNA Polymerase (Promega, WI, USA), and 1  $\mu\text{l}$  of DNA template. The second multiplex PCR  
360 amplified microsatellites 182 and 207<sup>26</sup>. DNA was amplified in a 10  $\mu\text{l}$  reaction volume  
361 containing water, 10X Original Buffer, 25 mM MgCl, 10 mM dNTP, 5  $\mu\text{M}$  182-6fam, 5  $\mu\text{M}$  207-  
362 pet, 5 U/ $\mu\text{l}$  GoTaq Flexi DNA Polymerase, and 1  $\mu\text{l}$  of DNA. Each PCR mixture was denatured at  
363  $94^{\circ}\text{C}$  for 5 minutes followed by 35 cycles of:  $94^{\circ}\text{C}$  for 20 seconds,  $54^{\circ}\text{C}$  for 20 seconds, and  
364  $72^{\circ}\text{C}$  for 30 seconds. Samples were held at  $72^{\circ}\text{C}$  for 30 minutes for final extension. Samples  
365 were checked for sequence amplification success by running 4  $\mu\text{l}$  of PCR product on a 2%



366 agarose gel. Once amplification was verified, samples were sent to the Genomics Core Facility at  
367 the Pennsylvania State University for Fragment Analysis on the Applied Biosystems 3730XL  
368 DNA analyzer. Two persons independently called allele sizes for each microsatellite locus using  
369 Genemapper 5.0 software (Thermo Fisher Scientific). In *A. palmata*, post-embryonic mutations  
370 manifest as additional alleles in microsatellite chromatographs. Most frequently, a mutant  
371 genotype shows one additional allele at one of the five loci. The mutation is most often one  
372 repeat size larger or smaller than the ancestral allele of that genet<sup>19</sup>. The ancestral allele is  
373 established by comparing at least five samples from a genet and determining the majority alleles.  
374 Through this analysis, Sand Island Blue Mutant had a third allele at microsatellite locus 166 that  
375 the ancestral Sand Island Blue genet did not have<sup>19</sup>. The Elbow Green Mutant genet had a third  
376 allele at microsatellite locus 192 that the ancestral Elbow Green genet did not. Post-embryonic  
377 mutations were not detected in Sand Island Orange at any of the five microsatellite loci.

378

379 **2018 spawning collection.** Seven nights after the full moon (AFM, September 2<sup>nd</sup>, 2018), a  
380 subset of *A. palmata* colonies from Spanish Water reef (Lat. 12.0636, Long. -68.8532) in  
381 Curacao produced eggs that underwent cell division in the presence of only their own sperm.  
382 Despite efforts to quickly separate sperm from eggs after subsequent spawning events, eggs from  
383 these colonies continued to display apparent self-fertilization, followed by normal larval  
384 development and normal larval swimming behaviors, on two additional spawning nights.  
385 Embryos from all three spawning nights were allowed to develop in containers of filtered  
386 seawater (spun polypropylene filters, 0.5  $\mu$ m). Larvae were then shipped to Mote Marine  
387 Laboratory for settlement and rearing. At month four post-fertilization, 81 offspring were  
388 preserved in 96% ethanol and shipped to the Pennsylvania State University for genetic marker  
389 analysis. In addition, the coral colony that produced the apparently self-fertilized eggs was  
390 sampled in five locations along two of its branches ( $n=10$ ). In addition, one sample was taken  
391 from each of the five nearest neighboring colonies ( $n=5$ , Fig. 3a). These fifteen samples were  
392 also preserved in 96% ethanol for genetic marker analysis. To collect tissue from the adult  
393 colonies, whole polyps including skeletal material were sampled. These adult colonies had  
394 spawned gametes the previous night and thus tissue samples most likely contained a mixture of  
395 reproductive and vegetative tissue.

396



397 **SNP analysis and *de novo* detection of post-embryonic mutations.** We extracted genomic  
398 DNA from 81 recruits and 15 parent samples using the DNeasy kit (Qiagen, USA) following the  
399 manufacturer's protocol with slight modifications optimized for corals  
400 (<https://doi.org/10.17504/protocols.io.bgjqjumw>). Samples were genotyped using an Affymetrix  
401 genotyping array<sup>33</sup> and analyzed using the STAG analysis portal  
402 (<https://coralsnp.science.psu.edu/galaxy/33>). A total of 19,694 genotyping probes were extracted  
403 for downstream analyses using vcfR package in R<sup>48</sup>. Genotype calls were converted into '0/0',  
404 '0/1', or '1/1'. A call of '0/0' is homozygous for allele A at that locus, likewise, a call of '1/1' is  
405 homozygous for allele B at that locus and a call of '0/1' means that the sample is heterozygous at  
406 a locus with respect to allele A and B. Missing data and heterozygosity for each sample was  
407 calculated as the sum of probes with 'NA' or '0/1' calls, respectively, divided by the total  
408 number of probes in R<sup>49</sup>. Gower's genetic dissimilarity and parentage assignment for the  
409 respective crosses were calculated using the R script *apparent* as previously described<sup>35</sup>. To infer  
410 parental haplotype blocks and recombination events, the genotype data from the offspring  
411 siblings were phased using the *bmh* and *recombination* functions in the *hsphase* R package<sup>50</sup> and  
412 plotted with the *ComplexHeatmap* package<sup>51</sup>. Post-embryonic mutations in the parent samples  
413 and ramet samples (representative of possible variation within the parent colony) were tallied for  
414 each locus across parent colony and ramet samples. Based on the premise that the ancestral allele  
415 should be more frequent than the mutated or alternate allele, alleles were designated as ancestral  
416 if eight or more ramets shared the allele. Parental mutant alleles were similarly tallied in the  
417 offspring. The b-allele frequency and log R ratios were calculated using the 'affy2vcf' bcftools  
418 plugin (<https://github.com/freeseek/gtc2vcf>), as part of the STAG workflow. Genomic location  
419 and predicted effect of the mutations were found with snpEff v4.3<sup>52</sup> using the *A. digitifera*  
420 genome assembly<sup>53</sup>.

421

#### 422 **RFLP validation of post-embryonic mutations**

423 SNP-RFLP markers were designed using methods described in Kitchen, et al. <sup>54</sup> with  
424 modifications outlined below. Briefly, 28 of the 139 mutations were screened using WatCut  
425 ([http://watcut.uwaterloo.ca/template.php?act=snp\\_new](http://watcut.uwaterloo.ca/template.php?act=snp_new)). Primers were designed using Primer 3<sup>55</sup>  
426 based on 500 bp of flanking sequence around the SNP extracted with bedtools *getfasta* utility

427 v2.27.1<sup>56</sup> from the *A. digitifera* genome<sup>53</sup> for 19 of the 28 variant mutations with restriction  
428 enzyme cut-sites identified (Table S10). DNA of two of the larvae (SWSA-179, SWSA-181) and  
429 two parents (453 and 455) were chosen for validation of their SNP calls. SNP-containing regions  
430 were amplified by PCR in a 10 µl reaction volume containing water, 1X NH<sub>4</sub> Buffer (Bioline,  
431 Boston, MA), 3 mM MgCl (Bioline, Boston, MA), 1 mM dNTP (Bioline, Boston, MA), 250  
432 nmol forward and reverse primers (IDT, Coralville, Iowa), 1 unit Biolase Taq (Bioline, Boston,  
433 MA), and 1 µl of template DNA. PCR product was then denatured at 94°C for 5 minutes, then 35  
434 cycles of PCR were performed (94°C for 20 seconds, 55.2°C for 20 seconds, 72°C for 30  
435 seconds). PCR wells were then held for a final extension at 72°C for 30 minutes. The resulting  
436 PCR product was then directly digested by restriction enzyme HypAV in a 10 µl reaction volume  
437 containing 5 µl PCR product, 1X CutSmart Buffer, 0.5 µl of enzyme HpyAV (New England  
438 Biolabs, Ipswich, MA), and water to volume. Digests were held at 37°C for 1 hour, then held at  
439 65°C for 20 minutes to heat-kill the enzyme. PCR and digest products were visualized using  
440 electrophoresis on 2% agarose gel.

441

#### 442 **Acknowledgements**

443 We would like to thank Kathryn Stankiewicz for her assistance with R and Drs. Dana Williams  
444 and Margaret Miller provided field support for the 2017 experiment. We also thank Meghann  
445 Devlin-Durante for her help with the microsatellite analysis, Dr. Mary Hagedorn for overseeing  
446 the larval shipment to Mote Marine Laboratory, Daisy Flores, Lucas Tichy, and Valerie  
447 Chamberland for dive and lab assistance, and Cornelia Osborne for manuscript edits. Funding  
448 was provided by Funding for this project was supported by NOAA Office for Coastal  
449 Management NA17NOS4820083, and NSF OCE-1537959 to IBB. Special thanks to the Paul G.  
450 Allen Family Foundation for funding spawning operations and larval rearing in Curacao and  
451 Florida 2018.

452

#### 453 **Data and code availability**

454 SNP data for the samples in this study can be exported at  
455 <https://coralsnp.science.psu.edu/galaxy/>. Code will be provided on a GitHub repository at the  
456 time of publication.

457

458 **Author contributions**

459 K.L.V.K. carried out the 2017 experiment, designed the 2018 experiment, analyzed data, and co-  
460 wrote the paper; S.A.K. contributed to the design and execution of the 2017 experiment, carried  
461 out part of the SNP analyses and co-wrote the paper; T.L.C. assisted with the parentage analysis  
462 and performed the RFLP assays; S.A.V. helped with the SNP analyses and edited the paper;  
463 A.N.C. assisted with the 2017 experiment and edited the paper; C.P. reared the recruits used for  
464 SNP analyses; K.L.M. and M.J.V. collected spawn and tissue samples, coordinated fieldwork,  
465 and edited the paper; I.B.B. oversaw the research, co-designed the 2017 and 2018 experiments,  
466 obtained funding, and co-wrote the paper.

467

468 **Competing interest**

469 The authors declare no competing interests.

470

471 **Additional Information:**

472 **Supplementary information** is available for this paper. Tables S1 through S10 are compiled  
473 into an excel document.

474 **Correspondence and request for materials** should be addressed to I.B.B.

475

476 **References**

477

478 1 Weismann, A. *Das Keimplasma: eine Theorie der Vererbung*. (G. Fischer, 1892).

479 2 Huxley, J. *Evolution, The Modern Synthesis*. (G. Allen & Unwin Limited, 1942).

480 3 Juliano, C. & Wessel, G. Versatile Germline Genes. *Science* **329**, 640-641,  
481 doi:10.1126/science.1194037 (2010).

482 4 Gold, D. A. & Jacobs, D. K. Stem cell dynamics in Cnidaria: are there unifying  
483 principles? *Dev. Genes Evol.* **223**, 53-66 (2013).

484 5 Littlefield, C. L., Dunne, J. F. & Bode, H. R. Spermatogenesis in *Hydra oligactis*: I.  
485 Morphological description and characterization using a monoclonal antibody specific for  
486 cells of the spermatogenic pathway. *Dev. Biol.* **110**, 308-320,  
487 doi:[https://doi.org/10.1016/0012-1606\(85\)90090-9](https://doi.org/10.1016/0012-1606(85)90090-9) (1985).

488 6 Nishimiya-Fujisawa, C. & Sugiyama, T. Genetic analysis of developmental mechanisms  
489 in *Hydra*. 20. Cloning of interstitial stem cells restricted to the sperm differentiation

- 490 pathway in *Hydra magnipapillata* *Dev. Biol.* **157**, 1-9, doi:10.1006/dbio.1993.1106  
491 (1993).
- 492 7 Borisenko, I. E., Adamska, M., Tokina, D. B. & Ereskovsky, A. V. Transdifferentiation is  
493 a driving force of regeneration in *Halisarca dujardini* (Demospongiae, Porifera). *PeerJ* **3**,  
494 e1211, doi:10.7717/peerj.1211 (2015).
- 495 8 Barfield, S., Aglyamova, G. V. & Matz, M. V. Evolutionary origins of germline  
496 segregation in Metazoa: evidence for a germ stem cell lineage in the coral *Orbicella*  
497 *faveolata* (Cnidaria, Anthozoa). *Proc. Royal Soc. B* **283**, doi:10.1098/rspb.2015.2128  
498 (2016).
- 499 9 Schweinsberg, M., Pech, R. A. G., Tollrian, R. & Lampert, K. P. Transfer of intracolony  
500 genetic variability through gametes in *Acropora hyacinthus* corals. *Coral Reefs* **33**, 77-  
501 87, doi:10.1007/s00338-013-1102-5 (2014).
- 502 10 Van Oppen, M. J., Souter, P., Howells, E. J., Heyward, A. & Berkelmans, R. Novel  
503 genetic diversity through somatic mutations: fuel for adaptation of reef corals? *Diversity*  
504 **3**, 405-423 (2011).
- 505 11 Gentile, L., Cebrià, F. & Bartscherer, K. The planarian flatworm: an in vivo model for  
506 stem cell biology and nervous system regeneration. *Dis. Models Mech.* **4**, 12-19,  
507 doi:10.1242/dmm.006692 (2011).
- 508 12 Sutherland, W. J. & Watkinson, A. R. Somatic mutation: Do plants evolve differently?  
509 *Nature* **320**, 305-305, doi:10.1038/320305a0 (1986).
- 510 13 Buss, L. W. Evolution, development, and the units of selection. *Proc. Natl. Acad. Sci.*  
511 *U.S.A.* **80**, 1387-1391 (1983).
- 512 14 Berger, F. & Twell, D. Germline Specification and Function in Plants. *Annu. Rev. Plant*  
513 *Biol.* **62**, 461-484, doi:10.1146/annurev-arplant-042110-103824 (2011).
- 514 15 Whitham, T. G. & Slobodchikoff, C. N. Evolution by individuals, plant-herbivore  
515 interactions, and mosaics of genetic variability: The adaptive significance of somatic  
516 mutations in plants. *Oecologia* **49**, 287-292, doi:10.1007/bf00347587 (1981).
- 517 16 Folse, H. J. & Roughgarden, J. Direct benefits of genetic mosaicism and intraorganismal  
518 selection: modeling coevolution between a long-lived tree and a short-lived herbivore.  
519 *Evolution* **66**, 1091-1113, doi:10.1111/j.1558-5646.2011.01500.x (2012).

- 520 17 Gill, D. E., Chao, L., Perkins, S. L. & Wolf, J. B. Genetic mosaicism in plants and clonal  
521 animals. *Annu. Rev. Ecol. Evol. Syst.* **26**, 423-444,  
522 doi:10.1146/annurev.es.26.110195.002231 (1995).
- 523 18 Goffredo, S. & Lasker, H. R. Modular growth of a gorgonian coral can generate  
524 predictable patterns of colony growth. *J. Exp. Mar. Biol. Ecol.* **336**, 221-229,  
525 doi:<https://doi.org/10.1016/j.jembe.2006.05.012> (2006).
- 526 19 Devlin-Durante, M. K., Miller, M. W., Caribbean Acropora Research, G., Precht, W. F.  
527 & Baums, I. B. How old are you? Genet age estimates in a clonal animal. *Mol. Ecol* **25**,  
528 5628-5646, doi:10.1111/mec.13865 (2016).
- 529 20 Loya, Y. Skeletal regeneration in a Red Sea Scleractinian coral population. *Nature* **261**,  
530 490-491, doi:10.1038/261490a0 (1976).
- 531 21 Barnes, R. S. K. & Hughes, R. N. *An Introduction to Marine Ecology.* (Wiley, 2009).
- 532 22 Technau, U. & Steele, R. E. Evolutionary crossroads in developmental biology: Cnidaria.  
533 *Development* **138**, 1447-1458, doi:10.1242/dev.048959 (2011).
- 534 23 Hughes, T. P. & Tanner, J. E. Recruitment failure, life histories, and long-term decline of  
535 Caribbean corals. *Ecology* **81**, 2250-2263, doi:10.1890/0012-9658 (2000).
- 536 24 Williams, D. E., Miller, M. W. & Kramer, K. L. Recruitment failure in Florida Keys  
537 *Acropora palmata*, a threatened Caribbean coral. *Coral Reefs* **27**, 697-705, doi:DOI  
538 10.1007/s00338-008-0386-3 (2008).
- 539 25 Shlesinger, T. & Loya, Y. Breakdown in spawning synchrony: A silent threat to coral  
540 persistence. *Science* **365**, 1002-1007, doi:10.1126/science.aax0110 (2019).
- 541 26 Baums, I. B., Hughes, C. R. & Hellberg, M. H. Mendelian microsatellite loci for the  
542 Caribbean coral *Acropora palmata*. *Mar. Ecol. Prog. Ser.* **288**, 115-127,  
543 doi:10.3354/meps288115 (2005).
- 544 27 Fogarty, N. D., Vollmer, S. V. & Levitan, D. R. Weak Prezygotic Isolating Mechanisms  
545 in Threatened Caribbean *Acropora* Corals. *PLoS One* **7**, e30486,  
546 doi:10.1371/journal.pone.0030486 (2012).
- 547 28 Richmond, R. H. Reproduction and recruitment of corals : comparisons among the  
548 Caribbean, the tropical Pacific, and the Red Sea. *Mar. Ecol. Prog. Ser.* **60**, 185-203,  
549 doi:10.3354/meps060185 (1990).

- 550 29 Combosch, D. J. & Vollmer, S. V. Mixed asexual and sexual reproduction in the Indo-P  
551 acific reef coral *Pocillopora damicornis*. *Ecol. Evol.* **3**, 3379-3387 (2013).
- 552 30 Eyal-Shaham, L. *et al.* A unique reproductive strategy in the mushroom coral *Fungia*  
553 *fungites*. *Coral Reefs*, 1-12 (2020).
- 554 31 Stoddart, J. Asexual production of planulae in the coral *Pocillopora damicornis*. *Mar.*  
555 *Biol.* **76**, 279-284 (1983).
- 556 32 Carlon, D. B. & Lippe, C. Fifteen new microsatellite markers for the reef coral *Favia*  
557 *fragum* and a new *Symbiodinium* microsatellite. *Mol. Ecol. Resour.* **8**, 870-873,  
558 doi:10.1111/j.1755-0998.2008.02095.x (2008).
- 559 33 Kitchen, S. A. *et al.* STAGdb: a 30K SNP genotyping array and Science Gateway for  
560 *Acropora* corals and their dinoflagellate symbionts. *Sci. Rep.* **10**, doi:10.1038/s41598-  
561 020-69101-z (2020).
- 562 34 Hagedorn, M. *et al.* Successful Demonstration of Assisted Gene Flow in the Threatened  
563 Coral *Acropora Palmata* Across Genetically-Isolated Caribbean Populations using  
564 Cryopreserved Sperm. *bioRxiv*, 492447, doi:10.1101/492447 (2018).
- 565 35 Melo, A. T. & Hale, I. ‘apparent’: a simple and flexible R package for accurate SNP-  
566 based parentage analysis in the absence of guiding information. *BMC Bioinformatics* **20**,  
567 1-10 (2019).
- 568 36 Engelstädter, J. Asexual but Not Clonal: Evolutionary Processes in Automictic  
569 Populations. *Genetics* **206(2)**, 993-1009, doi:doi:10.1534/genetics.116.196873 (2017).
- 570 37 Wang, L. *et al.* The architecture of intra-organism mutation rate variation in plants. *PLoS*  
571 *Biol.* **17**, e3000191, doi:10.1371/journal.pbio.3000191 (2019).
- 572 38 Shakiba, N. *et al.* Cell competition during reprogramming gives rise to dominant clones.  
573 *Science* **364**, ean0925, doi:10.1126/science.aan0925 (2019).
- 574 39 Bódi, Z. *et al.* Phenotypic heterogeneity promotes adaptive evolution. *PLoS Biol.* **15**,  
575 e2000644, doi:10.1371/journal.pbio.2000644 (2017).
- 576 40 Baums, I. B., Miller, M. W. & Hellberg, M. E. Geographic variation in clonal structure in  
577 a reef building Caribbean coral, *Acropora palmata*. *Ecol. Monogr.* **76**, 503-519,  
578 doi:10.1890/0012-9615 (2006).
- 579 41 Baums, I. B. A restoration genetics guide for coral reef conservation. *Mol. Ecol.* **17**, 2796-  
580 2811, doi:doi:10.1111/j.1365-294X.2008.03787.x (2008).



- 581 42 Honnay, O. & Bossuyt, B. Prolonged clonal growth: escape route or route to extinction?  
582 *Oikos* **108**, 427-432, doi:10.1111/j.0030-1299.2005.13569.x (2005).
- 583 43 Kawahata, H., Ohta, H., Inoue, M. & Suzuki, A. Endocrine disrupter nonylphenol and  
584 bisphenol A contamination in Okinawa and Ishigaki Islands, Japan--within coral reefs  
585 and adjacent river mouths. *Chemosphere* **55**, 1519-1527,  
586 doi:10.1016/j.chemosphere.2004.01.032 (2004).
- 587 44 Yu, L. *et al.* Somatic genetic drift and multilevel selection in a clonal seagrass. *Nat. Ecol.*  
588 *Evo.* **4**, 952-962, doi:10.1038/s41559-020-1196-4 (2020).
- 589 45 Markow, T. A. Parents Without Partners: *Drosophila* as a Model for Understanding the  
590 Mechanisms and Evolution of Parthenogenesis. *G3 (Bethesda)* **3**, 757-762,  
591 doi:10.1534/g3.112.005421 (2013).
- 592 46 Lampert, K. P. Facultative Parthenogenesis in Vertebrates: Reproductive Error or  
593 Chance? *Sex Dev* **2**, 290-301, doi:10.1159/000195678 (2008).
- 594 47 Felsenstein, J. The evolutionary advantage of recombination. *Genetics* **78**, 737-756  
595 (1974).
- 596 48 Knaus, B. J. & Grünwald, N. J. vcfr: a package to manipulate and visualize variant call  
597 format data in R. *Mol. Ecol. Resour.* **17**, 44-53 (2017).
- 598 49 R: A language and environment for statistical computing (R Foundation for Statistical  
599 Computing, Vienna, Austria, 2020).
- 600 50 Ferdosi, M. H., Kinghorn, B. P., Van der Werf, J. H., Lee, S. H. & Gondro, C. hspbase:  
601 an R package for pedigree reconstruction, detection of recombination events, phasing and  
602 imputation of half-sib family groups. *BMC Bioinformatics* **15**, 1-11 (2014).
- 603 51 Gu, Z., Eils, R. & Schlesner, M. Complex heatmaps reveal patterns and correlations in  
604 multidimensional genomic data. *Bioinformatics* **32**, 2847-2849 (2016).
- 605 52 Cingolani, P. *et al.* A program for annotating and predicting the effects of single  
606 nucleotide polymorphisms, SnpEff: SNPs in the genome of *Drosophila melanogaster*  
607 strain w1118; iso-2; iso-3. *Fly* **6**, 80-92 (2012).
- 608 53 Shinzato, C. *et al.* Using the *Acropora digitifera* genome to understand coral responses to  
609 environmental change. *Nature* **476**, 320-323, doi:10.1038/nature10249 (2011).
- 610 54 Kitchen, S. A. *et al.* Genomic variants among threatened *Acropora* corals. *G3:*  
611 *Genes|Genomes|Genetics*, g3.400125.402019, doi:10.1534/g3.119.400125 (2019).



612 55 Untergasser, A. *et al.* Primer3—new capabilities and interfaces. *Nucleic Acids Res. Spec.*  
613 *Publ.* **40**, e115-e115, doi:10.1093/nar/gks596 (2012).  
614 56 Quinlan, A. R. BEDTools: The Swiss-Army Tool for Genome Feature Analysis. *Curr*  
615 *Protoc Bioinformatics* **47**, 11.12.11-11.12.34, doi:10.1002/0471250953.bi1112s47  
616 (2014).  
617  
618
